# Supplementary material for: Assembly and Redox-Rich Hydride Chemistry of an Asymmetric Mo2S2 Platform
Source: Molecules. 2020 Jul 7;25(13):3090. doi: 10.3390/molecules25133090 (PMC7411697; doi:10.3390/molecules25133090)
Supplement: Supplementary file 1 [file molecules-25-03090-s001.zip]

Archive with 6 entries (6 files):
- DFT.xyz
- __MACOSX/._DFT.xyz
- checkCIF.pdf
- __MACOSX/._checkCIF.pdf
- SI.pdf
- __MACOSX/._SI.pdf
