# Supplementary material for: Assembly and Redox-Rich Hydride Chemistry of an Asymmetric Mo2S2 Platform
Source: Molecules. 2020 Jul 7;25(13):3090. doi: 10.3390/molecules25133090 (PMC7411697; doi:10.3390/molecules25133090)
Supplement: Supplementary file 1 [file molecules-25-03090-s001.zip › DFT.xyz]

32
XYZ file generated by orca_plot on BaseName=N3MoS2MoCpH_cation_constrained
  Mo     -0.087664      9.595674      4.523336
  N      -0.545800      7.684646      5.242330
  N       1.105241      9.245205      6.247736
  C      -0.100167      7.267571      6.440737
  C       0.846874      8.172559      7.040166
  C       1.559849      7.963842      8.217267
  H       1.326938      7.103556      8.844181
  C       2.594705      8.827556      8.541680
  H       3.161644      8.681309      9.460325
  C       2.954541      9.832716      7.652495
  H       3.828135     10.458758      7.831518
  C       2.205851     10.006837      6.497171
  C       2.504614     10.894354      5.402624
  N       1.662406     10.800108      4.392828
  S      -1.567403     11.013619      5.435480
  S      -0.765019      9.437420      2.339291
  Mo     -2.186023     10.902932      3.244888
  H      -1.096153     12.122763      2.904861
  C      -3.317550     11.660819      1.345093
  H      -2.891020     11.516516      0.357210
  C      -4.159591     10.758815      2.028048
  H      -4.508160      9.799900      1.655268
  C      -4.488725     11.345938      3.279844
  H      -5.126409     10.906604      4.042351
  C      -3.854242     12.595390      3.358485
  H      -3.905733     13.287371      4.193443
  C      -3.123925     12.782215      2.175568
  H      -2.540022     13.661473      1.922979
  H       3.345838     11.588568      5.405132
  H       1.819806     11.422533      3.598025
  H      -0.422216      6.330086      6.892993
  H      -1.209433      7.068287      4.770360


32
XYZ file generated by orca_plot on BaseName=N3MoS2MoCpH_anion
  Mo     12.883340      4.209770     11.985154
  S      14.877986      4.717100     10.959846
  S      11.955902      2.633320     10.578585
  N      11.785582      5.931733     11.274074
  N      12.114851      5.108091     13.632633
  N      13.443006      2.970237     13.626699
  C      11.164044      6.700134     12.201481
  C      11.319687      6.265016     13.525735
  C      10.784963      6.867779     14.661907
  H      10.168446      7.761276     14.540071
  C      11.038503      6.342079     15.931233
  H      10.622195      6.822277     16.818462
  C      11.839653      5.200393     16.058241
  H      12.054020      4.769649     17.038529
  C      12.355140      4.575982     14.919766
  C      13.102642      3.384045     14.881466
  Mo     13.904989      3.191098      9.555767
  H      14.838155      1.899195     10.143288
  C      15.377333      3.408753      7.728023
  H      16.376489      3.806057      7.876103
  C      14.214431      4.147485      7.499719
  H      14.150636      5.229451      7.421130
  C      13.129522      3.232219      7.388366
  H      12.090506      3.499340      7.215642
  C      13.621120      1.960180      7.550121
  H      13.032090      1.047156      7.544190
  C      15.000608      2.034377      7.780391
  H      15.668227      1.198605      7.961818
  H      13.936569      2.077472     13.582756
  H      13.357140      2.811630     15.775414
  H      10.578122      7.582849     11.935935
  H      11.660390      6.231877     10.306326


32
Coordinates from ORCA-job N3MoS2MoCpH_constrained
  Mo  2.38168780478325      2.88944353204584      3.60398673640427
  S   1.16455743724895      3.49091118498181      5.40134218367252
  S   0.80164569974237      2.67557524042107      1.95862627788800
  N   3.34862844096988      4.61087995053686      2.87935950300953
  C   4.62901591558924      4.88485775423739      3.21512912515302
  N   4.38299296980569      2.76636632752836      4.12552224390736
  C   5.25276657389370      3.83238733915413      3.90727773406873
  C   6.57640716222714      3.78133542533950      4.34133869055846
  H   7.21333368031292      4.65179352728642      4.17716629695100
  C   7.07970600058751      2.62836130815716      4.92212835593077
  H   8.11387583108979      2.58187718021346      5.26167463158140
  C   6.26349406454660      1.49430534523679      4.97757525982448
  H   6.65611555880458      0.53579302693959      5.31901778592095
  C   4.94388425329363      1.56383638270885      4.54378108105776
  C   4.04317448113332      0.48409342006709      4.42006394066842
  N   2.86514382481358      0.85497220097351      3.89071988006955
  Mo  -0.40970644804705      3.29286926921937      3.74126577109843
  H   -0.72001293315727      1.67809849361889      4.09793462387693
  C   -2.48854947368981      3.33550425641230      5.05760298550578
  H   -2.59731791923059      2.74722576661529      5.96359171898779
  C   -1.99058009079070      4.63896460441782      4.97665269551207
  H   -1.64839161293946      5.25550524260045      5.80202141705736
  C   -1.93466966026054      4.98479550536598      3.59704019833319
  H   -1.59498216755133      5.93797775623374      3.19777321606903
  C   -2.44773080226646      3.91574689933765      2.84792160576484
  H   -2.59001441674880      3.89206005990758      1.77212254794232
  C   -2.75523366596550      2.89324943287264      3.75040592933818
  H   -3.16284387448094      1.92208793802242      3.48619607023471
  H   4.24795505239257     -0.53443203414504      4.74800846897737
  H   2.15156534165413      0.13380778671699      3.78689031474872
  H   2.83617685294495      5.34031357188581      2.38567339781836
  H   5.09478711929460      5.84641430509025      3.00246231206865


40
Coordinates from ORCA-job N3MoS2MoCpH_DIcation_locked
  Mo  2.59092164813932      1.48752623521056      4.83447001609312
  S   1.70322028981881      1.53617752794889      6.91200782112357
  S   0.91340668875520      0.63786449739540      3.51581052862545
  N   2.33916605474956      3.45739418097630      3.95367324560120
  N   3.98833314183592      1.66765756927565      3.17978435588744
  N   3.74271108306778     -0.35061800834437      4.70767640363625
  C   3.11947826516867      3.84607749533789      2.99359079060788
  C   4.10531714048157      2.84832731454537      2.54353952333850
  C   5.10156286963125      3.05850886648306      1.59748082424384
  H   5.19239577763868      4.02734151233705      1.10880926576130
  C   5.98888384895493      2.02705277082894      1.32225321375686
  H   6.77867671406400      2.17248706912273      0.58584659173872
  C   5.89975717957020      0.83260497546318      2.01770828977040
  H   6.62002224587228      0.03051507209641      1.86491810047713
  C   4.89394026359692      0.69505832348233      2.96675035609672
  C   4.72510772967362     -0.45277244988334      3.86537782370928
  Mo  0.05824556672911      0.68254570686917      5.61693058707029
  H   0.55692168566462     -0.86876967839892      6.00555321258498
  C   -1.60763687654650     -0.63861322146200      6.59039266097539
  H   -1.41482065260415     -1.59555166443398      7.06516287598555
  C   -1.96368744669290     -0.44895035093311      5.23421915826894
  H   -2.05859592540113     -1.22774112974347      4.48407094256188
  C   -2.14792218436243      0.92882307728207      5.03268335976901
  H   -2.42922814096097      1.40843823468361      4.09966843702540
  C   -1.88343756592155      1.58806258970768      6.26287721616440
  H   -1.94804284406277      2.65880844033956      6.44074913129090
  C   -1.57736261340135      0.61322607037344      7.22619395977019
  H   -1.34152321774988      0.79554100326734      8.27015328252314
  S   5.71132555663434      2.97237759327150      5.46159825901323
  O   4.41890297078331      2.37728202482788      5.84616260537852
  O   6.65115898964120      2.02470578272907      4.94713635100331
  O   5.58669327997862      4.22804239428989      4.77746594156332
  C   6.38710382138194      3.43176963824336      7.09318614802070
  F   6.52971501540821      2.37126568329189      7.87928441112970
  F   7.58751818798091      3.99174278372582      6.93461821113130
  F   5.60721879332305      4.30972082807484      7.71702107347235
  H   3.59387720409353     -1.13458644084377      5.34776410732243
  H   5.37134353878063     -1.33109668790769      3.81123550214038
  H   1.66828756099150      4.14523603966294      4.30330037141592
  H   3.07052735529389      4.84518233080678      2.55675704395101
