# Supplementary material for: Assembly and Redox-Rich Hydride Chemistry of an Asymmetric Mo2S2 Platform
Source: Molecules. 2020 Jul 7;25(13):3090. doi: 10.3390/molecules25133090 (PMC7411697; doi:10.3390/molecules25133090)
Supplement: Supplementary file 1 [file molecules-25-03090-s001.zip › SI.pdf]

*Supporting Information for:*

**Assembly and Redox-Rich Hydride Chemistry of an  
Asymmetric Mo<sub>2</sub>S<sub>2</sub> Platform**

**Alex McSkimming, Jordan W. Taylor and W. Hill Harman\***

Department of Chemistry, University of California, Riverside, California, USA

## ***Contents***

|                                  |   |
|----------------------------------|---|
| Additional XRD Data              | 3 |
| NMR Data                         | 4 |
| FT-IR Data                       | 5 |
| Additional NMR data              | 7 |
| Additional Electrochemistry Data | 8 |
| Calculated Coordinates           | 9 |

*Additional XRD Data*

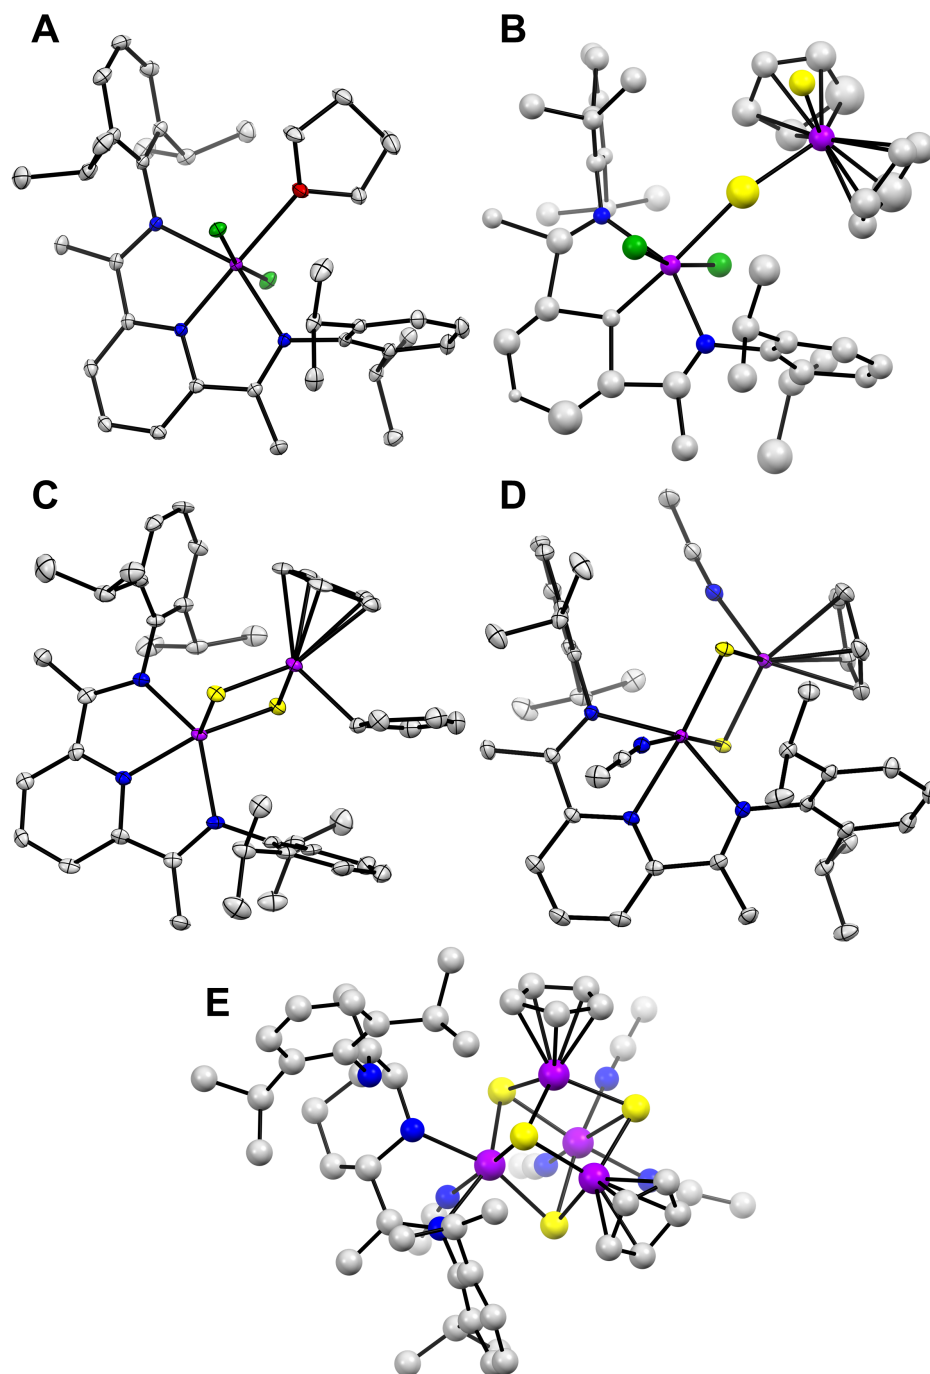

**Figure S1.** Thermal ellipsoid plots (50%) of (A) **1**, (C) **3**, (D) **5** and XRD connectivity assignments for (B) **2** and (E) **6**. Magenta, yellow, blue, orange, green and grey ellipsoids represent Mo, S, N, Na, F and C, respectively. Hydrogen atoms, solvent molecules and counter-ions are omitted for clarity.

# *NMR Data*

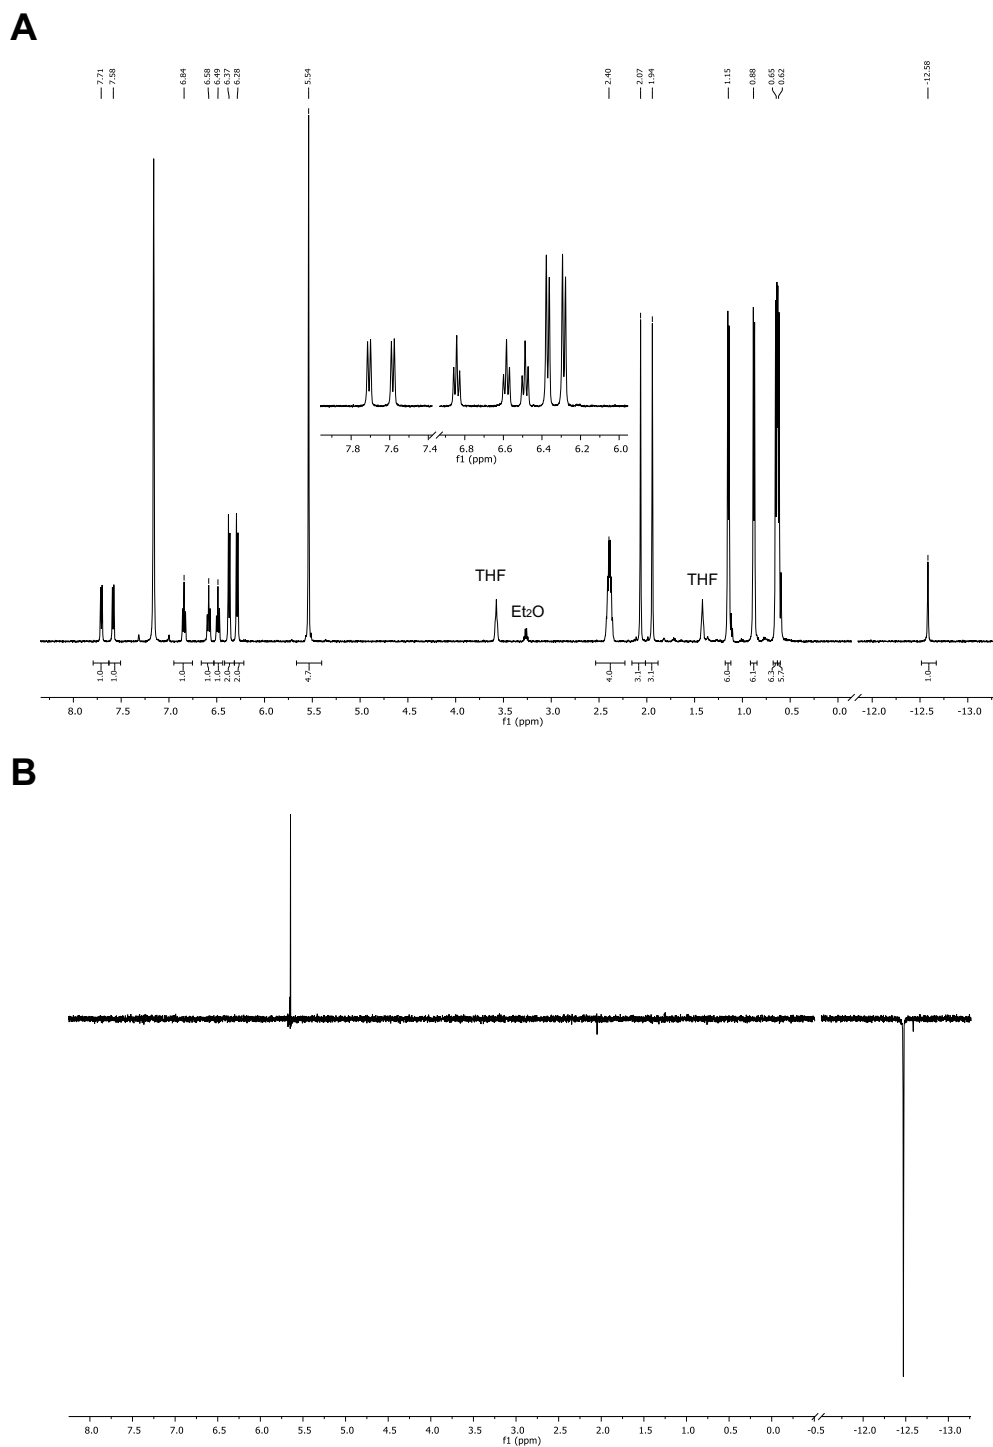

**Figure S2.** (A) <sup>1</sup>H NMR spectrum of **4** recorded in C<sub>6</sub>D<sub>6</sub> at 400 MHz; aromatic region inset. (B) 1D-<sup>1</sup>H-<sup>1</sup>H NOESY spectrum recorded for **4** with selective irradiation of the hydride resonance.

**FT-IR Data**

**A**

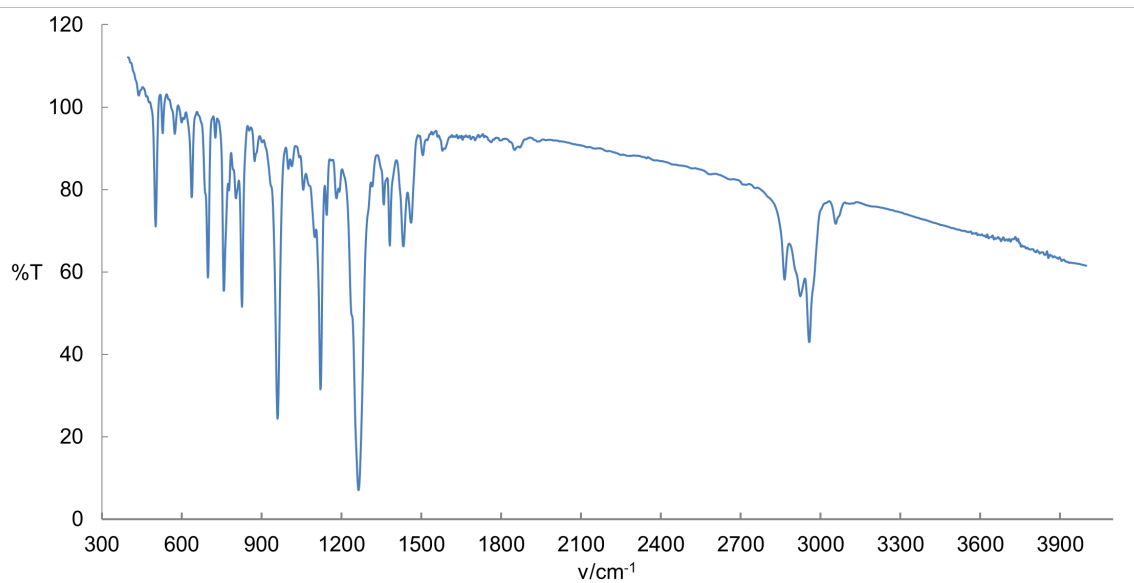

**B**

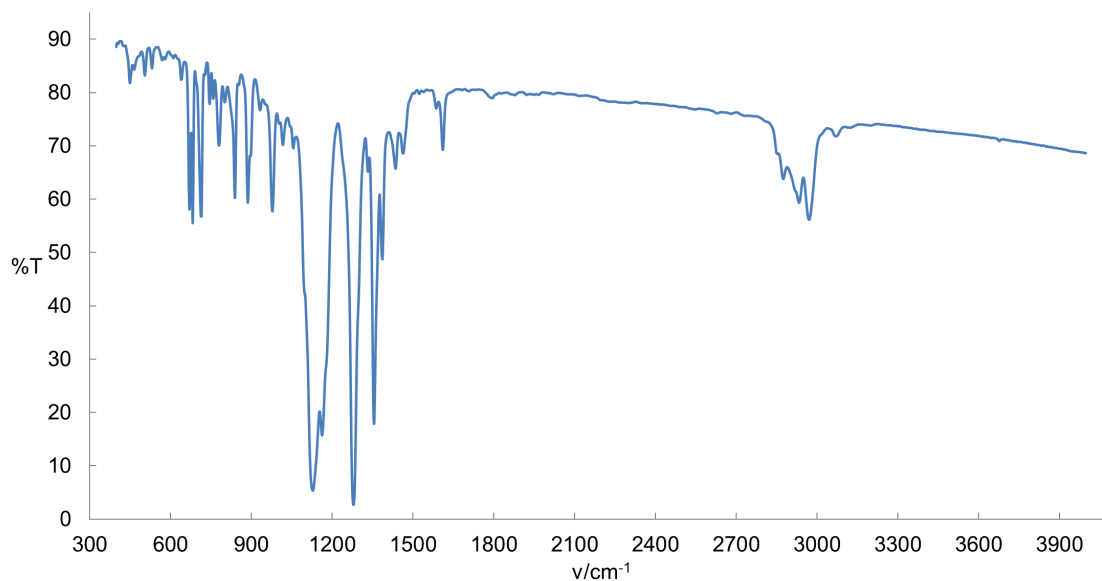

**Figure S3.** FT-IR spectra of (A) **4** and (B) **[4][BAr<sup>F</sup><sub>4</sub>]**

**A**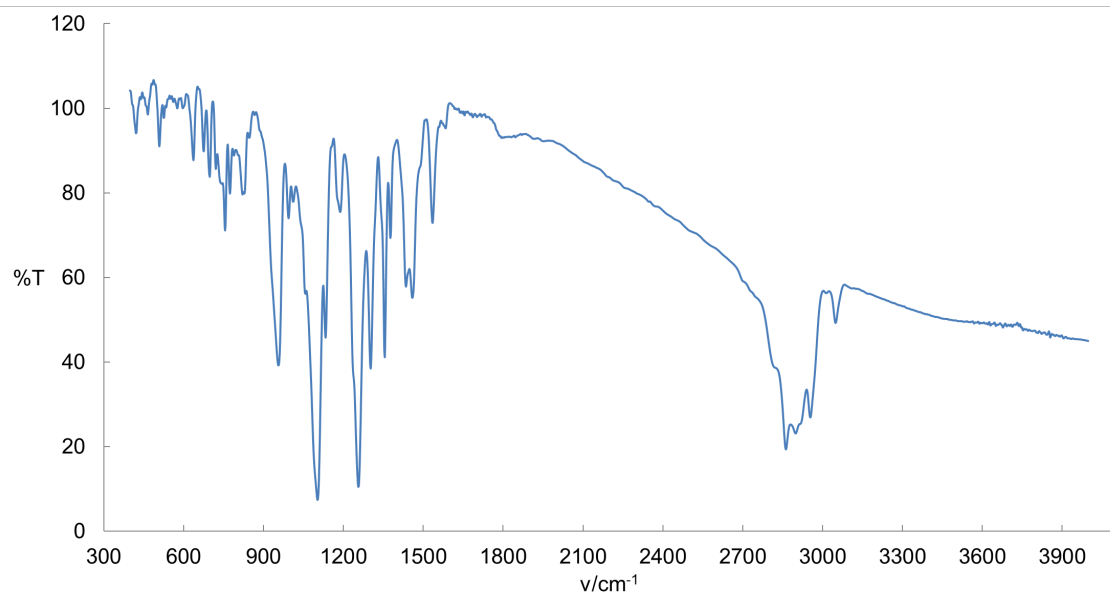**B**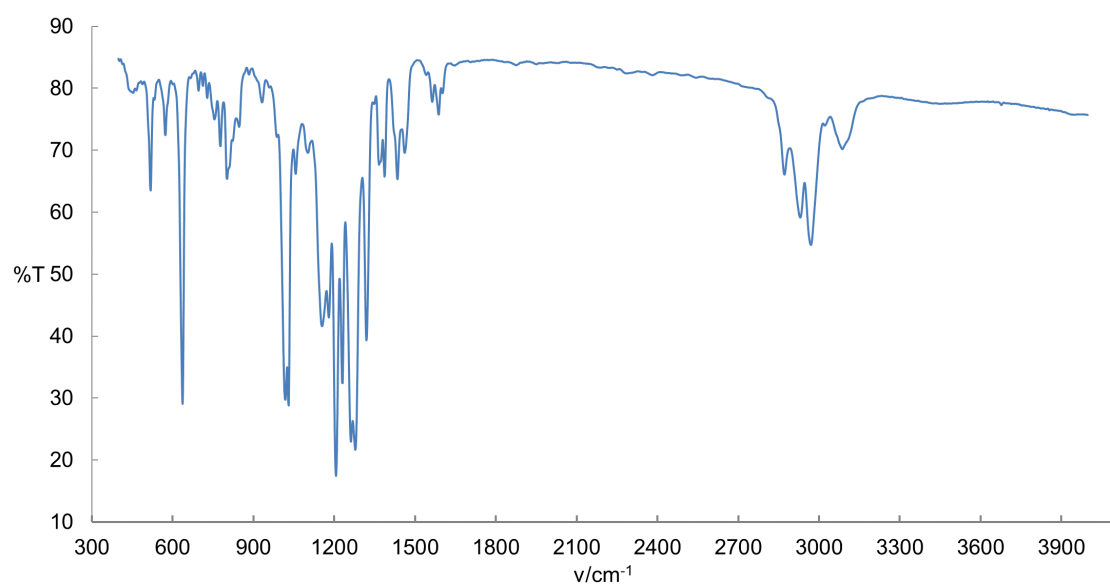

**Figure S4.** FT-IR spectra of (A) [4][Na(crypt-222)] and (B) [4-OTf][OTf]

*Additional NMR Data*

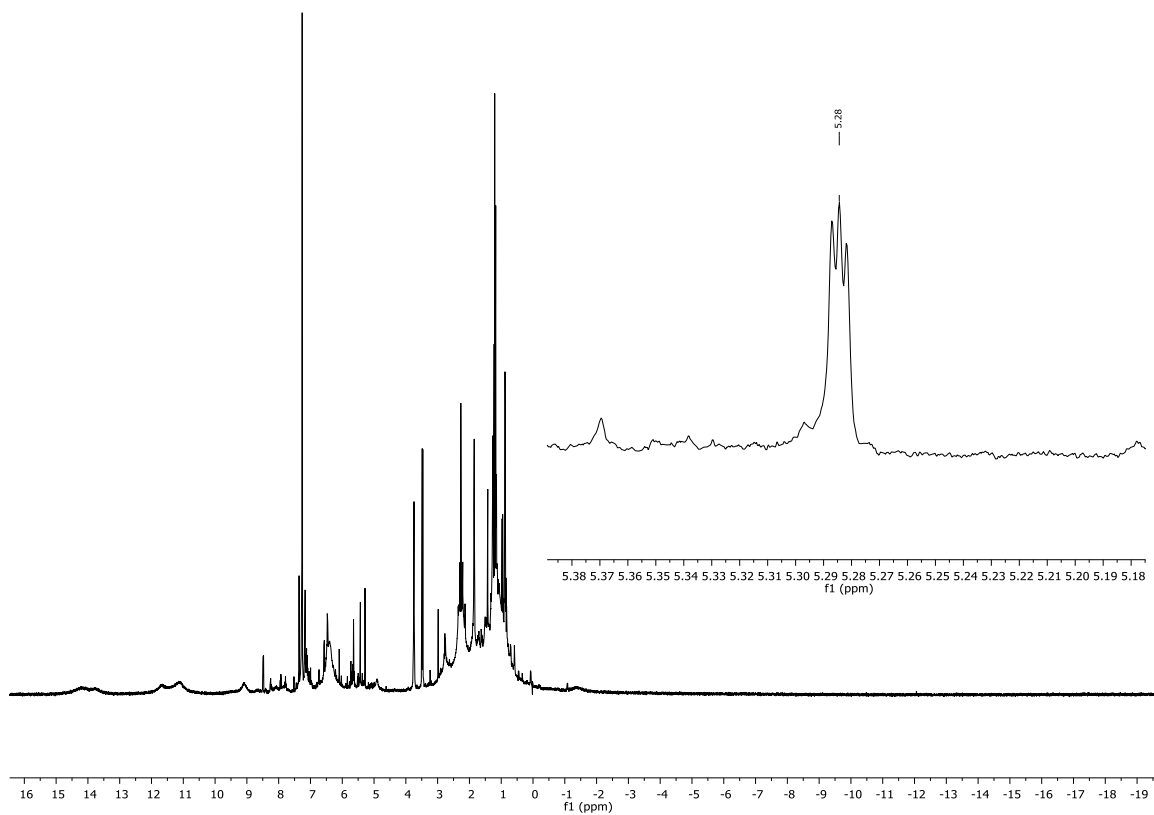

**Figure S5.**  $^1\text{H}$  NMR spectrum of **4** in  $\text{CDCl}_3$  recorded after  $\sim 1\text{h}$ . The inset highlights the peak corresponding to  $\text{CD}_2\text{Cl}_2$ .

### Additional Electrochemistry Data

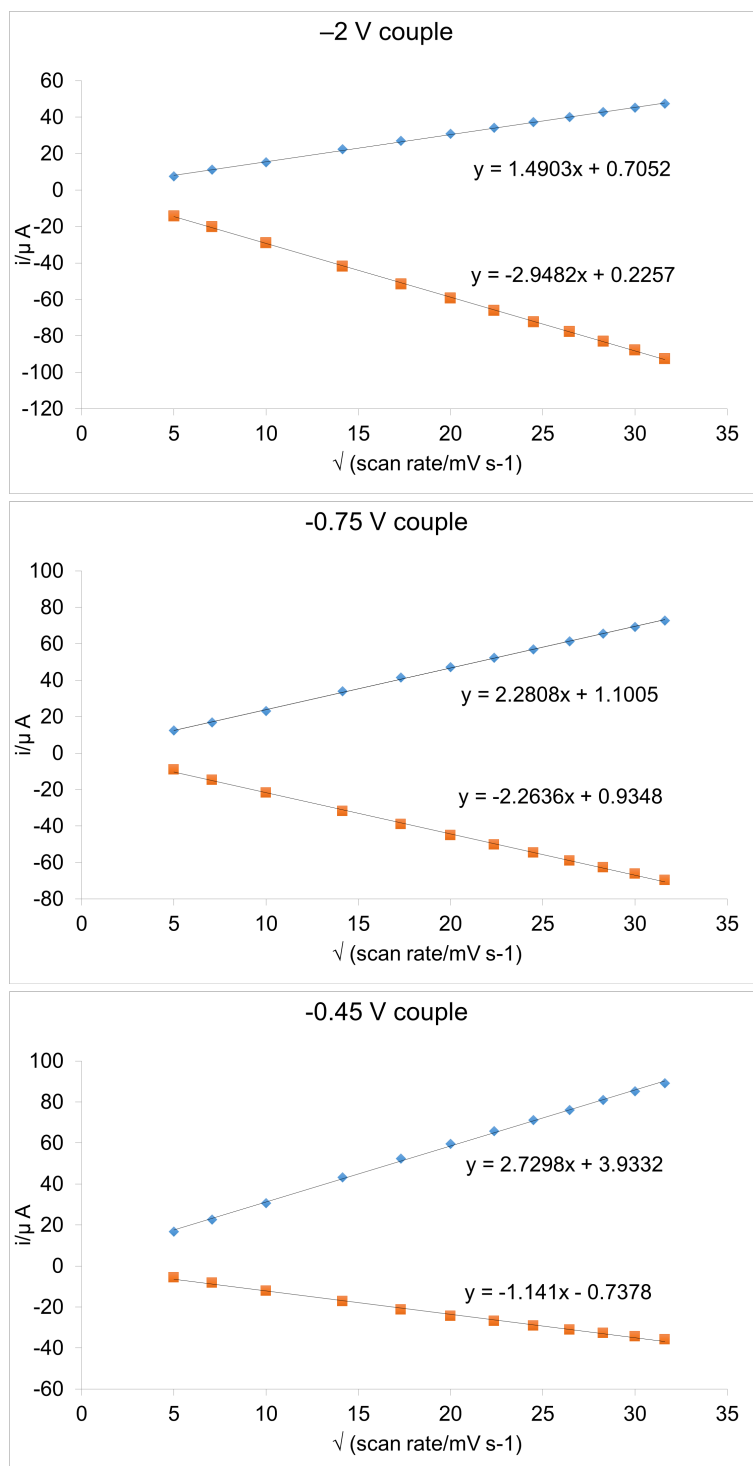

**Figure S6.** Associated Randles-Sevcik plots for the CV of **4** (shown in Figure 1).

## Calculated Coordinates

4

|    |                   |                   |                  |
|----|-------------------|-------------------|------------------|
| Mo | 2.38168780478325  | 2.88944353204584  | 3.60398673640427 |
| S  | 1.16455743724895  | 3.49091118498181  | 5.40134218367252 |
| S  | 0.80164569974237  | 2.67557524042107  | 1.95862627788800 |
| N  | 3.34862844096988  | 4.61087995053686  | 2.87935950300953 |
| C  | 4.62901591558924  | 4.88485775423739  | 3.21512912515302 |
| N  | 4.38299296980569  | 2.76636632752836  | 4.12552224390736 |
| C  | 5.25276657389370  | 3.83238733915413  | 3.90727773406873 |
| C  | 6.57640716222714  | 3.78133542533950  | 4.34133869055846 |
| H  | 7.21333368031292  | 4.65179352728642  | 4.17716629695100 |
| C  | 7.07970600058751  | 2.62836130815716  | 4.92212835593077 |
| H  | 8.11387583108979  | 2.58187718021346  | 5.26167463158140 |
| C  | 6.26349406454660  | 1.49430534523679  | 4.97757525982448 |
| H  | 6.65611555880458  | 0.53579302693959  | 5.31901778592095 |
| C  | 4.94388425329363  | 1.56383638270885  | 4.54378108105776 |
| C  | 4.04317448113332  | 0.48409342006709  | 4.42006394066842 |
| N  | 2.86514382481358  | 0.85497220097351  | 3.89071988006955 |
| Mo | -0.40970644804705 | 3.29286926921937  | 3.74126577109843 |
| H  | -0.72001293315727 | 1.67809849361889  | 4.09793462387693 |
| C  | -2.48854947368981 | 3.33550425641230  | 5.05760298550578 |
| H  | -2.59731791923059 | 2.74722576661529  | 5.96359171898779 |
| C  | -1.99058009079070 | 4.63896460441782  | 4.97665269551207 |
| H  | -1.64839161293946 | 5.25550524260045  | 5.80202141705736 |
| C  | -1.93466966026054 | 4.98479550536598  | 3.59704019833319 |
| H  | -1.59498216755133 | 5.93797775623374  | 3.19777321606903 |
| C  | -2.44773080226646 | 3.91574689933765  | 2.84792160576484 |
| H  | -2.59001441674880 | 3.89206005990758  | 1.77212254794232 |
| C  | -2.75523366596550 | 2.89324943287264  | 3.75040592933818 |
| H  | -3.16284387448094 | 1.92208793802242  | 3.48619607023471 |
| H  | 4.24795505239257  | -0.53443203414504 | 4.74800846897737 |
| H  | 2.15156534165413  | 0.13380778671699  | 3.78689031474872 |
| H  | 2.83617685294495  | 5.34031357188581  | 2.38567339781836 |
| H  | 5.09478711929460  | 5.84641430509025  | 3.00246231206865 |

[4]<sup>+</sup>

|    |           |          |          |
|----|-----------|----------|----------|
| Mo | -0.087664 | 9.595674 | 4.523336 |
| N  | -0.545800 | 7.684646 | 5.242330 |
| N  | 1.105241  | 9.245205 | 6.247736 |
| C  | -0.100167 | 7.267571 | 6.440737 |
| C  | 0.846874  | 8.172559 | 7.040166 |
| C  | 1.559849  | 7.963842 | 8.217267 |
| H  | 1.326938  | 7.103556 | 8.844181 |
| C  | 2.594705  | 8.827556 | 8.541680 |
| H  | 3.161644  | 8.681309 | 9.460325 |
| C  | 2.954541  | 9.832716 | 7.652495 |

|    |           |           |          |
|----|-----------|-----------|----------|
| H  | 3.828135  | 10.458758 | 7.831518 |
| C  | 2.205851  | 10.006837 | 6.497171 |
| C  | 2.504614  | 10.894354 | 5.402624 |
| N  | 1.662406  | 10.800108 | 4.392828 |
| S  | -1.567403 | 11.013619 | 5.435480 |
| S  | -0.765019 | 9.437420  | 2.339291 |
| Mo | -2.186023 | 10.902932 | 3.244888 |
| H  | -1.096153 | 12.122763 | 2.904861 |
| C  | -3.317550 | 11.660819 | 1.345093 |
| H  | -2.891020 | 11.516516 | 0.357210 |
| C  | -4.159591 | 10.758815 | 2.028048 |
| H  | -4.508160 | 9.799900  | 1.655268 |
| C  | -4.488725 | 11.345938 | 3.279844 |
| H  | -5.126409 | 10.906604 | 4.042351 |
| C  | -3.854242 | 12.595390 | 3.358485 |
| H  | -3.905733 | 13.287371 | 4.193443 |
| C  | -3.123925 | 12.782215 | 2.175568 |
| H  | -2.540022 | 13.661473 | 1.922979 |
| H  | 3.345838  | 11.588568 | 5.405132 |
| H  | 1.819806  | 11.422533 | 3.598025 |
| H  | -0.422216 | 6.330086  | 6.892993 |
| H  | -1.209433 | 7.068287  | 4.770360 |

[4]<sup>-</sup>

|    |           |          |           |
|----|-----------|----------|-----------|
| Mo | 12.883340 | 4.209770 | 11.985154 |
| S  | 14.877986 | 4.717100 | 10.959846 |
| S  | 11.955902 | 2.633320 | 10.578585 |
| N  | 11.785582 | 5.931733 | 11.274074 |
| N  | 12.114851 | 5.108091 | 13.632633 |
| N  | 13.443006 | 2.970237 | 13.626699 |
| C  | 11.164044 | 6.700134 | 12.201481 |
| C  | 11.319687 | 6.265016 | 13.525735 |
| C  | 10.784963 | 6.867779 | 14.661907 |
| H  | 10.168446 | 7.761276 | 14.540071 |
| C  | 11.038503 | 6.342079 | 15.931233 |
| H  | 10.622195 | 6.822277 | 16.818462 |
| C  | 11.839653 | 5.200393 | 16.058241 |
| H  | 12.054020 | 4.769649 | 17.038529 |
| C  | 12.355140 | 4.575982 | 14.919766 |
| C  | 13.102642 | 3.384045 | 14.881466 |
| Mo | 13.904989 | 3.191098 | 9.555767  |
| H  | 14.838155 | 1.899195 | 10.143288 |
| C  | 15.377333 | 3.408753 | 7.728023  |
| H  | 16.376489 | 3.806057 | 7.876103  |
| C  | 14.214431 | 4.147485 | 7.499719  |
| H  | 14.150636 | 5.229451 | 7.421130  |
| C  | 13.129522 | 3.232219 | 7.388366  |
| H  | 12.090506 | 3.499340 | 7.215642  |
| C  | 13.621120 | 1.960180 | 7.550121  |
| H  | 13.032090 | 1.047156 | 7.544190  |

|   |           |          |           |
|---|-----------|----------|-----------|
| C | 15.000608 | 2.034377 | 7.780391  |
| H | 15.668227 | 1.198605 | 7.961818  |
| H | 13.936569 | 2.077472 | 13.582756 |
| H | 13.357140 | 2.811630 | 15.775414 |
| H | 10.578122 | 7.582849 | 11.935935 |
| H | 11.660390 | 6.231877 | 10.306326 |

[4-OTf]<sup>+</sup>

|    |                   |                   |                  |
|----|-------------------|-------------------|------------------|
| Mo | 2.59092164813932  | 1.48752623521056  | 4.83447001609312 |
| S  | 1.70322028981881  | 1.53617752794889  | 6.91200782112357 |
| S  | 0.91340668875520  | 0.63786449739540  | 3.51581052862545 |
| N  | 2.33916605474956  | 3.45739418097630  | 3.95367324560120 |
| N  | 3.98833314183592  | 1.66765756927565  | 3.17978435588744 |
| N  | 3.74271108306778  | -0.35061800834437 | 4.70767640363625 |
| C  | 3.11947826516867  | 3.84607749533789  | 2.99359079060788 |
| C  | 4.10531714048157  | 2.84832731454537  | 2.54353952333850 |
| C  | 5.10156286963125  | 3.05850886648306  | 1.59748082424384 |
| H  | 5.19239577763868  | 4.02734151233705  | 1.10880926576130 |
| C  | 5.98888384895493  | 2.02705277082894  | 1.32225321375686 |
| H  | 6.77867671406400  | 2.17248706912273  | 0.58584659173872 |
| C  | 5.89975717957020  | 0.83260497546318  | 2.01770828977040 |
| H  | 6.62002224587228  | 0.03051507209641  | 1.86491810047713 |
| C  | 4.89394026359692  | 0.69505832348233  | 2.96675035609672 |
| C  | 4.72510772967362  | -0.45277244988334 | 3.86537782370928 |
| Mo | 0.05824556672911  | 0.68254570686917  | 5.61693058707029 |
| H  | 0.55692168566462  | -0.86876967839892 | 6.00555321258498 |
| C  | -1.60763687654650 | -0.63861322146200 | 6.59039266097539 |
| H  | -1.41482065260415 | -1.59555166443398 | 7.06516287598555 |
| C  | -1.96368744669290 | -0.44895035093311 | 5.23421915826894 |
| H  | -2.05859592540113 | -1.22774112974347 | 4.48407094256188 |
| C  | -2.14792218436243 | 0.92882307728207  | 5.03268335976901 |
| H  | -2.42922814096097 | 1.40843823468361  | 4.09966843702540 |
| C  | -1.88343756592155 | 1.58806258970768  | 6.26287721616440 |
| H  | -1.94804284406277 | 2.65880844033956  | 6.44074913129090 |
| C  | -1.57736261340135 | 0.61322607037344  | 7.22619395977019 |
| H  | -1.34152321774988 | 0.79554100326734  | 8.27015328252314 |
| S  | 5.71132555663434  | 2.97237759327150  | 5.46159825901323 |
| O  | 4.41890297078331  | 2.37728202482788  | 5.84616260537852 |
| O  | 6.65115898964120  | 2.02470578272907  | 4.94713635100331 |
| O  | 5.58669327997862  | 4.22804239428989  | 4.77746594156332 |
| C  | 6.38710382138194  | 3.43176963824336  | 7.09318614802070 |
| F  | 6.52971501540821  | 2.37126568329189  | 7.87928441112970 |
| F  | 7.58751818798091  | 3.99174278372582  | 6.93461821113130 |
| F  | 5.60721879332305  | 4.30972082807484  | 7.71702107347235 |
| H  | 3.59387720409353  | -1.13458644084377 | 5.34776410732243 |
| H  | 5.37134353878063  | -1.33109668790769 | 3.81123550214038 |
| H  | 1.66828756099150  | 4.14523603966294  | 4.30330037141592 |
| H  | 3.07052735529389  | 4.84518233080678  | 2.55675704395101 |
